# Supplementary material for: Willingness-to-pay for a probabilistic flood forecast: a risk-based decision-making game
Source: Copernicus journal article supplement (doi:10.5194/hess-2016-20), 2016-01-19
Supplement: Supplementary file 1 [file Fig.Appendix(2).pdf › data_figures/Fig.Appendix(2).pdf]

Do not forget to transfer your final Round 1 purse to Round 2 (in the brackets under ‘Purse’)

| Round                                                                                                                                 | Case | River level<br>before rainfall<br>(10-60) | Flood<br>protection?                                     | River level<br>increment<br>(10-80) | River level<br>after<br>increment | Flood?<br>( $\geq 90$ )                                  | Tokens<br>spent | Purse<br>(.....) |
|---------------------------------------------------------------------------------------------------------------------------------------|------|-------------------------------------------|----------------------------------------------------------|-------------------------------------|-----------------------------------|----------------------------------------------------------|-----------------|------------------|
| <i>Bid: ..... tokens. Did you buy a probabilistic forecast set? YES / NO</i><br><i>If yes, deduct the money you paid for it here:</i> |      |                                           |                                                          |                                     |                                   |                                                          |                 |                  |
| 2                                                                                                                                     | 1    |                                           | Yes <input type="checkbox"/> No <input type="checkbox"/> |                                     |                                   | Yes <input type="checkbox"/> No <input type="checkbox"/> |                 |                  |
|                                                                                                                                       | 2    |                                           | Yes <input type="checkbox"/> No <input type="checkbox"/> |                                     |                                   | Yes <input type="checkbox"/> No <input type="checkbox"/> |                 |                  |
|                                                                                                                                       | 3    |                                           | Yes <input type="checkbox"/> No <input type="checkbox"/> |                                     |                                   | Yes <input type="checkbox"/> No <input type="checkbox"/> |                 |                  |
|                                                                                                                                       | 4    |                                           | Yes <input type="checkbox"/> No <input type="checkbox"/> |                                     |                                   | Yes <input type="checkbox"/> No <input type="checkbox"/> |                 |                  |
|                                                                                                                                       | 5    |                                           | Yes <input type="checkbox"/> No <input type="checkbox"/> |                                     |                                   | Yes <input type="checkbox"/> No <input type="checkbox"/> |                 |                  |

- How was your performance as a decision-maker in Round 2?  
☐ very bad   ☐ quite bad   ☐ neither good nor bad   ☐ quite good   ☐ very good   ☐ I don't know
- For the people who DID NOT buy a forecast set:
  - Why didn't you buy a forecast set?  
☐ The model did not seem reliable  
☐ The price was too high  
☐ Other reason (explain): .....
- For the people who DID buy a forecast set:
  - How was your forecast set in Round 2?  
☐ very bad   ☐ quite bad   ☐ neither good nor bad   ☐ quite good   ☐ very good   ☐ I don't know
  - Were the forecasts worth what you paid for them? ☐ Yes   ☐ No
  - If not, how many tokens would you now pay for them? ..... tokens

Please return this worksheet into the envelope and give it to one of the assistants before you leave.  
 Thank you for your participation!  
 We hope you enjoyed it!
