# Supplementary material for: Willingness-to-pay for a probabilistic flood forecast: a risk-based decision-making game
Source: Copernicus journal article supplement (doi:10.5194/hess-2016-20), 2016-01-19
Supplement: Supplementary file 2 [file Fig.Appendix.pdf › data_figures/Fig.Appendix.pdf]

## How much are you prepared to PAY for a forecast?

Occupation (student, PhD candidate, scientist, operational hydrologist, forecaster, professor, lecturer, other):

.....

How many years of experience do you have?    ☐ < 5 years    ☐ 5 to 10 years    ☐ > 10 years

**Flood protection = -2,000 tokens; flood without protection = -4,000 tokens**

**Flood occurs at 90 or above**

| Round | Case | River level<br>before rainfall<br>(10-60) | Flood<br>protection?                                     | River level<br>increment<br>(10-80) | River level<br>after<br>increment | Flood?<br>( $\geq 90$ )                                  | Tokens<br>spent | Purse<br>(20,000) |
|-------|------|-------------------------------------------|----------------------------------------------------------|-------------------------------------|-----------------------------------|----------------------------------------------------------|-----------------|-------------------|
| 1     | 1    |                                           | Yes <input type="checkbox"/> No <input type="checkbox"/> |                                     |                                   | Yes <input type="checkbox"/> No <input type="checkbox"/> |                 |                   |
|       | 2    |                                           | Yes <input type="checkbox"/> No <input type="checkbox"/> |                                     |                                   | Yes <input type="checkbox"/> No <input type="checkbox"/> |                 |                   |
|       | 3    |                                           | Yes <input type="checkbox"/> No <input type="checkbox"/> |                                     |                                   | Yes <input type="checkbox"/> No <input type="checkbox"/> |                 |                   |
|       | 4    |                                           | Yes <input type="checkbox"/> No <input type="checkbox"/> |                                     |                                   | Yes <input type="checkbox"/> No <input type="checkbox"/> |                 |                   |
|       | 5    |                                           | Yes <input type="checkbox"/> No <input type="checkbox"/> |                                     |                                   | Yes <input type="checkbox"/> No <input type="checkbox"/> |                 |                   |

- How was your forecast set in Round 1?  
☐ very bad    ☐ quite bad    ☐ neither good nor bad    ☐ quite good    ☐ very good    ☐ I don't know
- How was your performance as a decision-maker in Round 1?  
☐ very bad    ☐ quite bad    ☐ neither good nor bad    ☐ quite good    ☐ very good    ☐ I don't know

**Round 2**
